# Supplementary material for: Multifunctional Oxidized Dextran as a Matrix for Stabilization of Octahedral Molybdenum and Tungsten Iodide Clusters in Aqueous Media
Source: MDPI journal article supplement (doi:10.3390/ijms241210010), 2023-06-11
Supplement: s1 [file s1]

## Supporting Information

# Multifunctional oxidized dextran as matrix for stabilization of octahedral molybdenum and tungsten iodide clusters in aqueous media

Ekaterina V. Pronina <sup>1</sup>, Yuri A. Vorotnikov <sup>1,\*</sup>, Tatiana N. Pozmogova <sup>1</sup>, Alphiya R. Tsygankova <sup>1</sup>, Kaplan Kirakci <sup>2</sup>, Kamil Lang <sup>2</sup>, Michael A. Shestopalov <sup>1</sup>

**Table S1.** Chemical groups content and molecular weights of initial and oxidized dextrans [1].

| Sample           | Carbonyl groups, mmol·g <sup>-1</sup> | Acidic groups, mmol·g <sup>-1</sup> | M <sub>w</sub> , kDa |
|------------------|---------------------------------------|-------------------------------------|----------------------|
| Dex6             | -                                     | -                                   | 6.2                  |
| NaOxDex6(1)      | 0.6                                   | 1.4                                 | 3.8                  |
| NaOxDex6(2)      | 0.6                                   | 2.3                                 | 3.9                  |
| Dex60            | -                                     | -                                   | 60.2                 |
| NaOxDex60(1)     | 1.0                                   | 1.0                                 | 14.0                 |
| NaOxDex60(2)     | 1.3                                   | 1.5                                 | 4.5                  |
| NaOxDex60(2)-red | 0.8                                   | 1.5                                 | 4.5                  |

1. Pronina, E.V.; Vorotnikov, Y.A.; Pozmogova, T.N.; Solovieva, A.O.; Miroshnichenko, S.M.; Plyusnin, P.E.; Pishchur, D.P.; Eltsov, I.V.; Edeleva, M.V.; Shestopalov, M.A.; et al. No Catalyst Added Hydrogen Peroxide Oxidation of Dextran: An Environmentally Friendly Route to Multifunctional Polymers. *ACS Sustain. Chem. Eng.* **2020**, *8*, 5371-5379, doi:10.1021/acssuschemeng.0c01030.

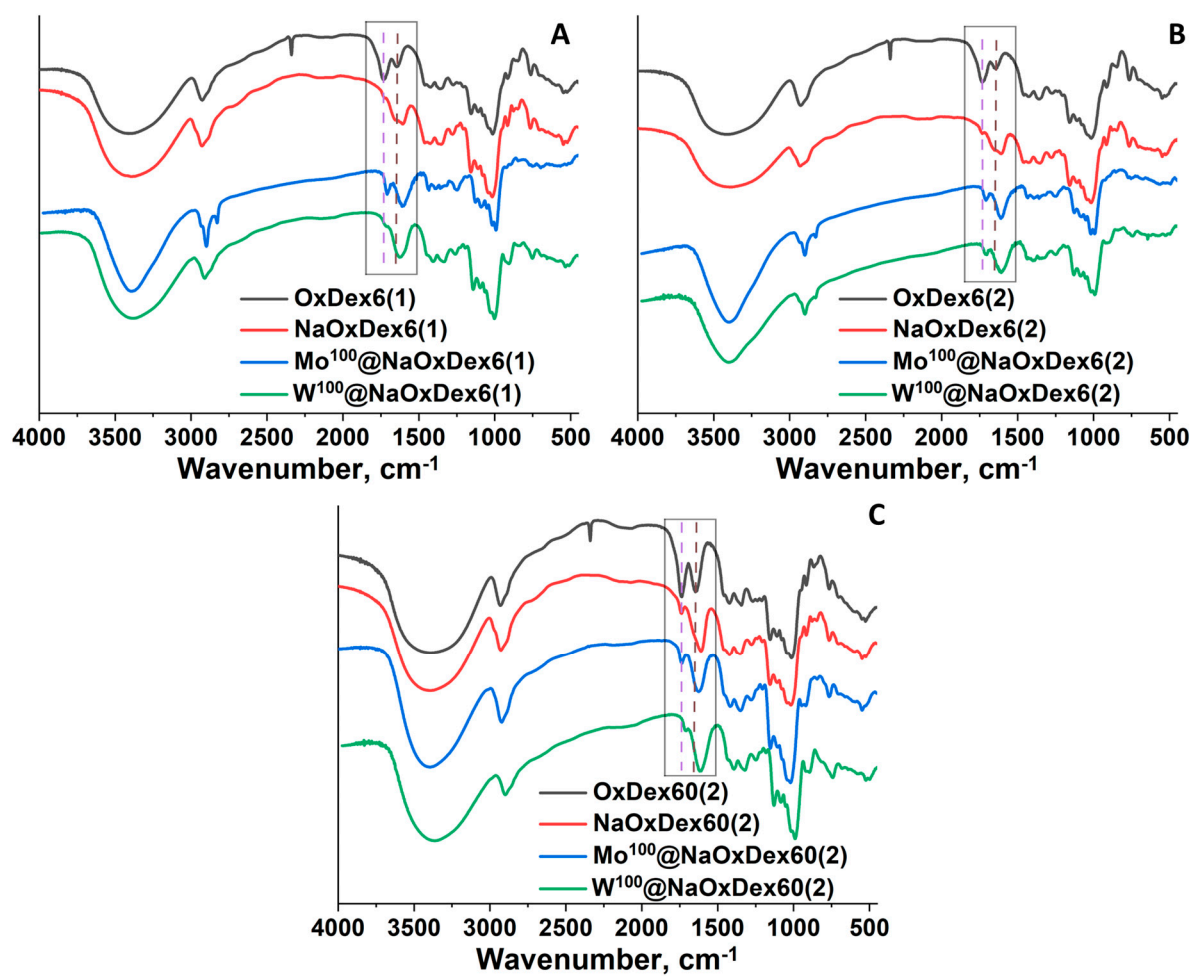

**Figure S1.** FTIR spectra of OxDexQ(n), NaOxDexQ(n), Mo<sup>100</sup>@NaOxDexQ(n), and W<sup>100</sup>@NaOxDexQ(n) (A – Q = 6, n = 1; B – Q = 6, n = 2; C – Q = 60, n = 2).

**Table S2.** {M<sub>6</sub>I<sub>8</sub>} content in materials (μmol·g<sup>-1</sup>) according to ICP-AES

| x             | 10 | 50  | 100 |
|---------------|----|-----|-----|
| <b>M = Mo</b> |    |     |     |
| Dex6          | -  | -   | 28  |
| NaOxDex6(1)   | 33 | 122 | 139 |
| NaOxDex6(2)   | 31 | 127 | 144 |
| Dex60         | -  | -   | 54  |
| NaOxDex60(1)  | 31 | 97  | 115 |
| NaOxDex60(2)  | 30 | 118 | 130 |
| <b>M = W</b>  |    |     |     |
| Dex6          | -  | -   | 48  |
| NaOxDex6(1)   | 11 | 51  | 82  |
| NaOxDex6(2)   | 13 | 51  | 87  |
| Dex60         | -  | -   | 59  |
| NaOxDex60(1)  | 20 | 49  | 125 |
| NaOxDex60(2)  | 16 | 58  | 119 |

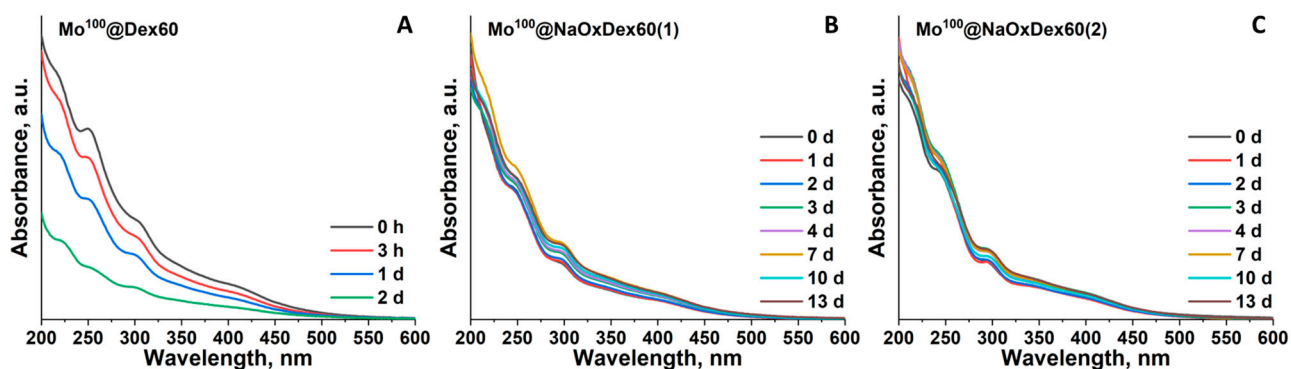

**Figure S2.** UV-vis spectra of Mo<sup>100</sup>@Dex60 (A), Mo<sup>100</sup>@NaOxDex60(1) (B), and Mo<sup>100</sup>@NaOxDex60(2) in water over time.

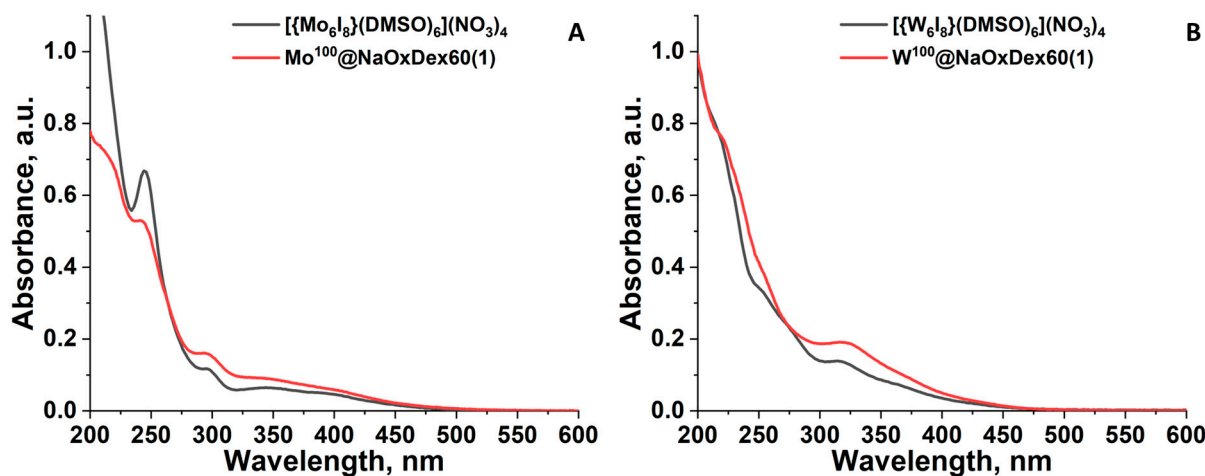

**Figure S3.** UV-vis spectra of M<sup>100</sup>@NaOxDex60(1), M = Mo (A) and W (B) in water, in comparison with corresponding initial clusters.

**Table S3.** Formulation of culture medium DMEM.

| Component                             | Concentration, mg/L | Component                                        | Concentration, mg/L |
|---------------------------------------|---------------------|--------------------------------------------------|---------------------|
| <b>Inorganic salts</b>                |                     | <b>Amino acids</b>                               |                     |
| Calcium Chloride · 2H <sub>2</sub> O  | 264.92              | L-Arginine · HCl                                 | 84.00               |
| Ferric Nitrate · 9H <sub>2</sub> O    | 0.10                | L-Cystine · 2HCl                                 | 62.58               |
| Magnesium Sulfate (Anhydr.)           | 97.67               | L-Glutamine                                      | 584.00              |
| Potassium Chloride                    | 400.00              | Glycine                                          | 30.00               |
| Sodium Chloride                       | 6400.00             | L-Histidine · HCl · H <sub>2</sub> O             | 42.00               |
| Sodium Phosphate, Monobasic (Anhydr.) | 108.69              | L-Isoleucine                                     | 104.80              |
| <b>Vitamins</b>                       |                     | L-Leucine                                        | 104.80              |
| Choline Chloride                      | 4.00                | L-Lysine · HCl                                   | 146.20              |
| Folic Acid                            | 4.00                | L-Methionine                                     | 30.00               |
| myo-Inositol                          | 7.00                | L-Phenylalanine                                  | 66.00               |
| Nicotinamide                          | 4.00                | L-Serine                                         | 42.00               |
| D-Pantothenic Acid, Hemicalcium Salt  | 4.00                | L-Threonine                                      | 95.20               |
| Pyridoxal · HCl                       | 4.00                | L-Tryptophan                                     | 16.00               |
| Riboflavin                            | 0.40                | L-Tyrosine · Na <sub>2</sub> · 2H <sub>2</sub> O | 103.79              |
| Thiamine · HCl                        | 4.00                | L-Valine                                         | 93.60               |
| <b>Other components</b>               |                     |                                                  |                     |
| D-Glucose                             | 1000.00             | Sodium Bicarbonate                               | 3700.00             |

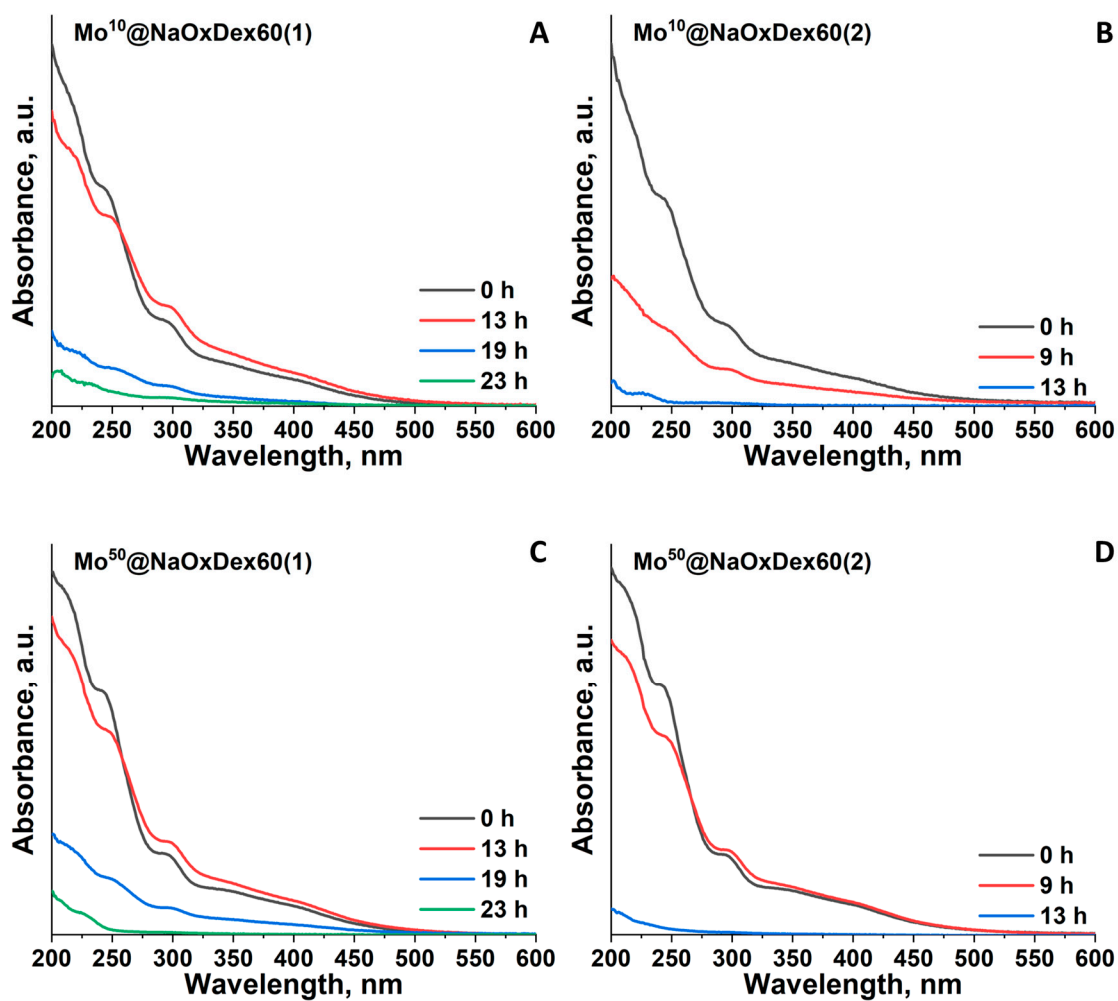

**Figure S4.** UV-vis spectra of Mo<sup>x</sup>@NaOxDex60(*n*) (A – *x* = 10, *n* = 1; B – *x* = 10, *n* = 2; C – *x* = 50, *n* = 1; D – *x* = 50, *n* = 2) in DMEM culture medium over time.

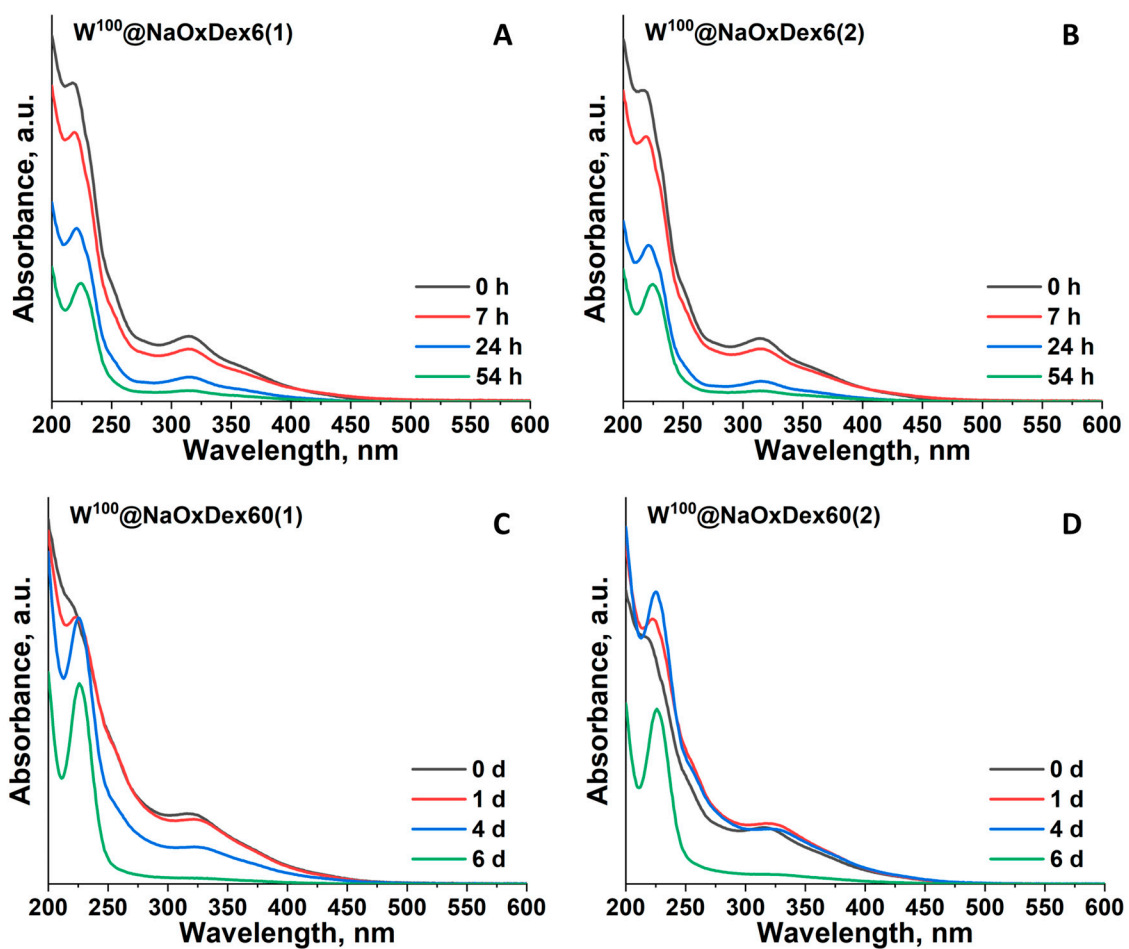

**Figure S5.** UV-vis spectra of  $W^{100}@NaOxDexQ(n)$  (A – Q = 6, n = 1; B – Q = 6, n = 2; C – Q = 60, n = 1; D – Q = 60, n = 2) in DMEM culture medium over time.

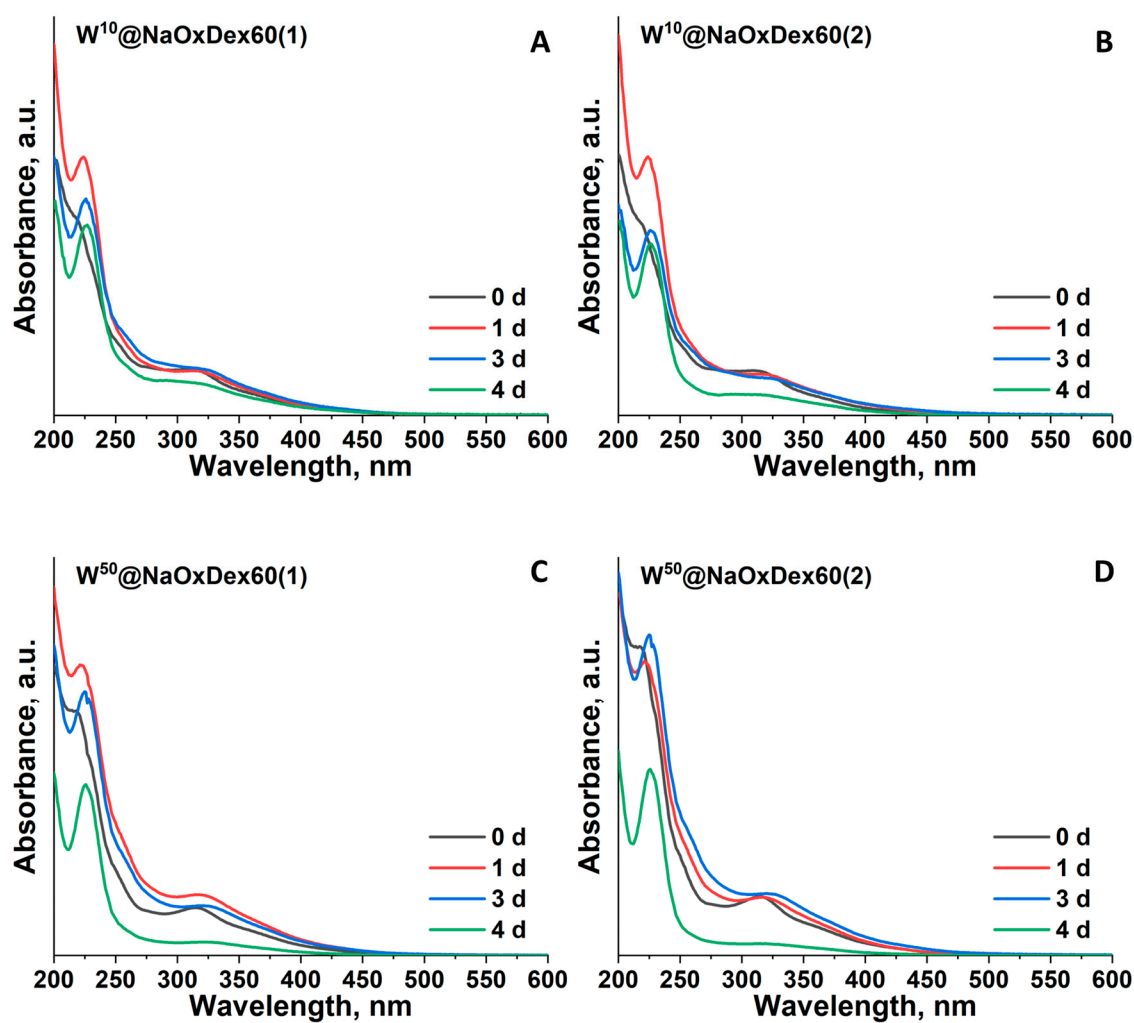

**Figure S6.** UV-vis spectra of  $W^x@NaOxDex60(n)$  (A –  $x = 10$ ,  $n = 1$ ; B –  $x = 10$ ,  $n = 2$ ; C –  $x = 50$ ,  $n = 1$ ; D –  $x = 50$ ,  $n = 2$ ) in DMEM culture medium over time.

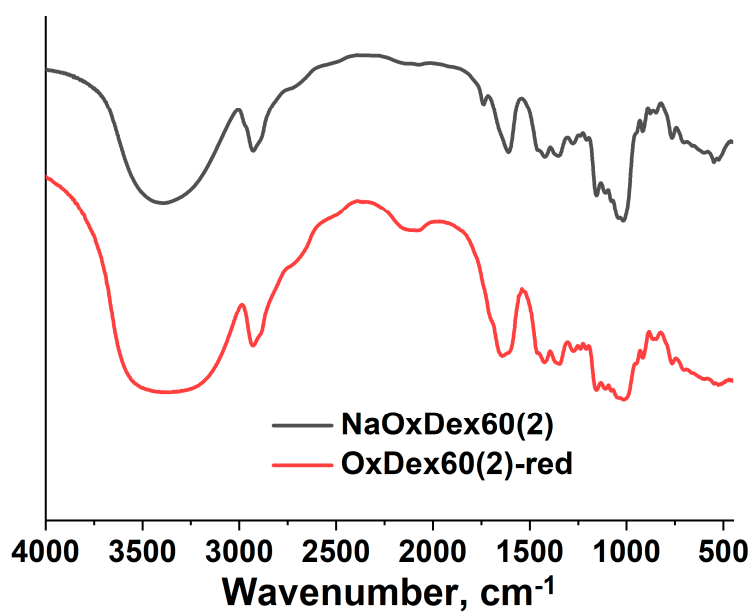

Figure S7. FTIR spectra of NaOxDex60(2) and NaOxDex60(2)-red.

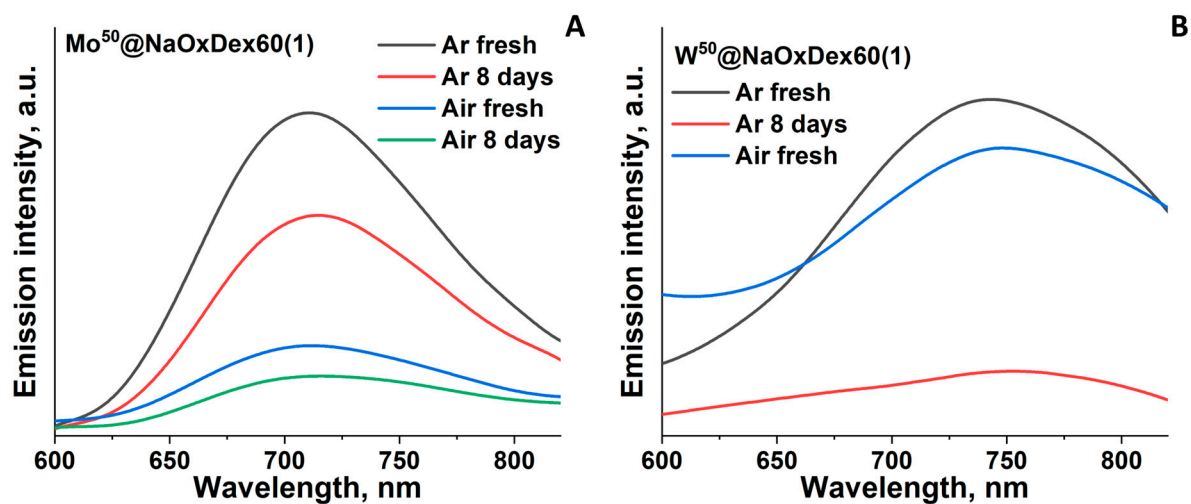

Figure S8. Emission spectra of fresh and 8-days old solution of  $\text{Mo}^{50}\text{@NaOxDex60(1)}$  in PBS (air and Ar) (A); Emission spectra of fresh and 8-days old solution of  $\text{W}^{50}\text{@NaOxDex60(1)}$  in PBS (air and Ar) (B).
